# Supplementary material
Source: PubMed Central journal article supplement (PMC4326565)
Supplement: NIHMS646286-supplement-Supplemental_Digital_Content.pdf [file NIHMS646286-supplement-Supplemental_Digital_Content.pdf]

**Supplemental Tables (S1-S3):**

|                             | Projected<br>Peripartum/Intrauterine<br>MTCT Risk (%)<br>CD4>350 / CD4≤350 <sup>a</sup> | Projected 6-Month<br>Breastfeeding<br>MTCT Risk (%)<br>CD4>350 / CD4≤350 <sup>a</sup> |
|-----------------------------|-----------------------------------------------------------------------------------------|---------------------------------------------------------------------------------------|
| Maternal ART                |                                                                                         |                                                                                       |
| Initiated ≤ 28 weeks GA     | 0.4 <sup>13</sup> / 0.6 <sup>12</sup>                                                   | 0.3 <sup>12</sup> / 0.3 <sup>12</sup>                                                 |
| Initiated 29-34 weeks GA    | 2.9 <sup>17</sup> / 3.7 <sup>17</sup>                                                   | 0.9 <sup>18</sup> / 1.1 <sup>17</sup>                                                 |
| Initiated >34 weeks GA      | 2.9 <sup>17</sup> / 4.1 <sup>18</sup>                                                   | 0.9 <sup>18</sup> / 1.1 <sup>17</sup>                                                 |
| Maternal ZDV monotherapy    |                                                                                         |                                                                                       |
| Initiated ≤ 34 weeks GA     | 3.4 <sup>17</sup> / 6.3 <sup>17</sup>                                                   | 4.0 <sup>14</sup> / 4.0 <sup>14</sup>                                                 |
| Initiated >34 weeks GA      | 5.8 <sup>15</sup> / 11.6 <sup>15</sup>                                                  | 4.7 <sup>20</sup> / 4.7 <sup>20</sup>                                                 |
| Maternal sdNVP/ZDV in labor | 6.6 <sup>19</sup> / 18.4 <sup>19</sup>                                                  | 2.3 <sup>20</sup> / 2.3 <sup>20</sup>                                                 |
| No maternal antiretrovirals | 21.8 <sup>16</sup> / 33.2 <sup>16</sup> <sup>b</sup>                                    | 2.7 <sup>20</sup> / 2.7 <sup>20</sup>                                                 |

**Table S1: Duration of ARV model inputs.**

Estimates of of risk of mother-to-child transmission by duration of maternal antiretrovirals and CD4 strata utilized in sensitivity analysis.

Note. MTCT, mother-to-child transmission; ART, combination antiretroviral therapy; GA, gestational age; ZDV, zidovudine; sdNPV, single-dose nevirapine

<sup>a</sup> CD4 strata were imputed for women without CD4 results following the distribution of CD4 counts in the study population.

<sup>b</sup> Calculated from Cox proportional hazards model.

|                                | Projected MTCT |          | Difference<br>(95% CI) | P-<br>value |
|--------------------------------|----------------|----------|------------------------|-------------|
|                                | Option A       | Option B |                        |             |
| Spectrum model inputs          |                |          |                        |             |
| Base                           | 3.79%          | 4.69%    | + 0.90%<br>(0.62-1.18) | <0.001      |
| Low                            | 2.76%          | 3.34%    | + 0.58%<br>(0.40-0.76) | <0.001      |
| High                           | 4.77%          | 5.56%    | + 1.08%<br>(0.72-1.44) | <0.001      |
| Duration of ARV receipt inputs | 4.87%          | 5.65%    | + 0.78%<br>(0.45-1.10) | <0.001      |

**Table S2: Sensitivity analyses of projected MTCT and impact of Option B.**

Estimates of risk of mother-to-child transmission and effect estimates of impact of Option B implementation under the Spectrum model inputs and estimates utilizing duration of ARV receipt.

Note. MTCT, mother-to-child transmission; CI, confidence interval; ARV, antiretrovirals

|                                                               | <b>Effect estimate,<br/>Change in MTCT probability<br/>(95% CI)</b> | <b>P-value</b> |
|---------------------------------------------------------------|---------------------------------------------------------------------|----------------|
| WHO strategy                                                  |                                                                     |                |
| Option A                                                      | —                                                                   | —              |
| Option B                                                      | +0.90<br>(0.62-1.18)                                                | <0.001         |
| Delivery hospital                                             | —                                                                   | <0.001         |
| ANC location                                                  |                                                                     |                |
| Urban (population >50,000)                                    | —                                                                   | —              |
| Large village (population<br>20,000-50,000)                   | + 0.16<br>(-0.15, 0.48)                                             | 0.31           |
| Rural (population <20,000)                                    | + 0.23<br>(-0.02, 0.49)                                             | 0.068          |
| ANC with onsite ART clinic                                    | - 0.36<br>(-0.59, -0.13)                                            | 0.002          |
| Receiving ART at conception                                   | - 4.27<br>(-4.50, -4.05)                                            | <0.001         |
| Maternal age < 25 years                                       | + 0.21<br>(-0.07, 0.50)                                             | 0.065          |
| Completed secondary education                                 | - 0.31<br>(-0.59, -0.03)                                            | 0.028          |
| Gestational at ANC registration (per<br>each additional week) | + 0.09<br>(0.07, 0.11)                                              | <0.001         |
| HIV diagnosis prior to pregnancy                              | - 0.45<br>(-0.73, -0.16)                                            | 0.002          |

**Table S3: Estimates of effect from multivariate model of PMTCT strategy and other factors on probability of MTCT.**

Note. MTCT, mother-to-child transmission; CI, confidence interval; WHO, World Health Organization; ANC, antenatal clinic; ART, combination antiretroviral therapy
